# Supplementary material for: A highly selective marker reaction for measuring the activity of human carboxylesterase 1 in complex biological samples
Source: Royal Society of Chemistry journal article supplement (doi:10.1039/c5ra23614b), 2015-12-21
Supplement: c5ra23614b1.pdf [file c5ra23614b1.pdf]

## Supplementary Information

### A highly selective marker reaction for measuring the activity of human carboxylesterase 1 in complex biological samples

Xia Lv<sup>a</sup>, Dan-Dan Wang<sup>a</sup>, Lei Feng<sup>b</sup>, Ping Wang<sup>a</sup>, Li-Wei Zou<sup>a</sup>, Da-Cheng Hao<sup>d</sup>, Jie Hou<sup>b,c,\*</sup>, Jing-Nan Cui<sup>b</sup>, Guang-Bo Ge<sup>\*a,b</sup>, Ling Yang<sup>\*a,e</sup>

<sup>a</sup> *Laboratory of Pharmaceutical Resource Discovery, Dalian Institute of Chemical Physics, Chinese Academy of Sciences, Dalian 116023, China. E-mail: geguangbo@dicp.ac.cn & yling@dicp.ac.cn*

<sup>b</sup> *State Key Laboratory of Fine Chemicals, Dalian University of Technology, Dalian 116012, China*

<sup>c</sup> *Dalian Medical University, Dalian, China*

<sup>d</sup> *Dalian Jiaotong University, Dalian, China*

<sup>e</sup> *Jiangxi University of Traditional Chinese Medicine, Nanchang, 330004, China.*

#### Contents:

Fig. S1 <sup>1</sup>H-NMR spectrum of NMHN.

Fig. S2 <sup>13</sup>C-NMR spectrum of NMHN

Fig. S3 HR-MS spectrum of NMHN.

Fig. S4 Inhibitory effects of selective chemical inhibitors on NMHN hydrolysis in cell preparations.

Fig. S5 NCHN formation rate in the presence of increasing concentration of hCE1.

Table S1 Limit of detection (LOD) and limit of quantification (LOQ) for NCHN and NMHN.

Table S2 Intra-day and inter-day precision and accuracy of the LC-FD method for quantitative determination of NMHN and NCHN.

Table S3 Recovery of the LC-UV method for quantitative determination of NMHN and NCHN in HLM.

Table S4 Recovery of the LC-FD method for quantitative determination of NMHN and NCHN in HLM.

Table S5 The features of currently used probes for hCE1.

## Synthesis and characterization of NMHN

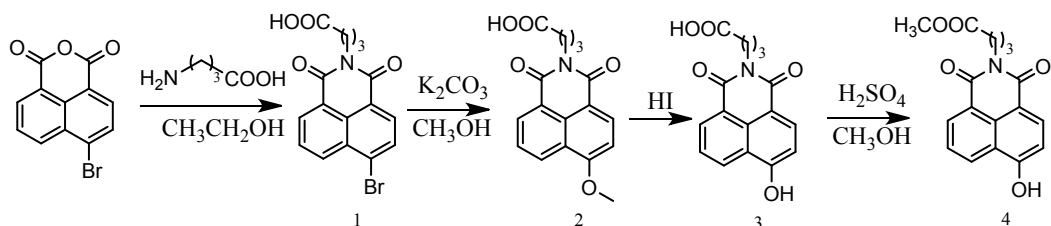

**Scheme S1.** The synthetic route of NMHN

### Synthesis of compound 1

4-Bromo-1, 8-naphthalic anhydride (1 g, 3.62 mmol) and 4-aminobutyric acid (0.412 g, 3.98 mmol) were dissolved in ethanol (50 mL). The reaction mixture was stirred and refluxed for 8 h. After cooling to room temperature, the mixture was poured into ice water; the precipitate was isolated, washed with water, and dried to yield 1.21 g of a yellowish-color solid (92.6%). <sup>1</sup>H-NMR (400 MHz, DMSO)  $\delta$  = 12.01 (s, 1H), 8.54 (dd, *J* = 10.6, 8.0 Hz, 2H), 8.32 (d, *J* = 7.9 Hz, 1H), 8.21 (d, *J* = 7.9 Hz, 1H), 8.04-7.94 (m, 1H), 4.08 (t, *J* = 6.9 Hz, 2H), 2.31 (t, *J* = 7.3 Hz, 2H), 1.89 (p, *J* = 7.1 Hz, 2H). <sup>13</sup>C-NMR (100 MHz, DMSO)  $\delta$  174.49, 163.31, 132.84, 131.85, 131.64, 131.23, 130.05, 129.42, 129.08, 128.60, 123.11, 122.33, 39.97, 31.82, 23.38. HRMS calcd for C<sub>16</sub>H<sub>13</sub>BrNO<sub>4</sub><sup>+</sup> ([M + H]<sup>+</sup>) 362.0022, found 362.0021.

### Synthesis of compound 2

A mixture of compound 1 (0.8 g, 2.22 mmol) and K<sub>2</sub>CO<sub>3</sub> (2.54 g, 18.4 mmol) in 30 mL CH<sub>3</sub>OH was refluxed for 10 h. After cooling to room temperature, the pH value was adjusted to about 2 by the addition of concentrated HCl. The precipitate was filtered, washed with water and dried to yield compound 2 as a yellow-color solid (0.562 g, yield: 80.1%). <sup>1</sup>H-NMR (400 MHz, DMSO)  $\delta$  = 12.05 (s, 1H), 8.49 (dd, *J* = 8.4, 7.8, 1.1, 2H), 8.43 (d, *J* = 8.3, 1H), 7.80 (dd, *J* = 8.3, 7.4, 1H), 7.31 (d, *J* = 8.4, 1H), 4.13 (s, 3H), 4.06 (t, *J* = 7.0, 2H), 2.30 (t, *J* = 7.4, 2H), 1.88 (d, *J* = 7.2, 2H). <sup>13</sup>C-NMR (100 MHz, DMSO)  $\delta$  23.59, 31.82, 39.33, 56.99, 116.36, 114.39, 122.01, 122.86, 126.45, 131.15, 133.39, 160.48, 163.27, 163.93, 174.45. HRMS calcd for C<sub>17</sub>H<sub>16</sub>NO<sub>5</sub><sup>+</sup> ([M + H]<sup>+</sup>) 314.1023, found 314.1025.

### Synthesis of compound 3

A mixture of compound 2 (0.3 g, 0.96 mmol) and 10 mL concentrated HI (55-58%) was refluxed for 14 h. After cooling the mixture was poured into water; the precipitate was isolated, washed with water, and dried to yield 0.235 g of the yellow needles solid (81.9%). <sup>1</sup>H-NMR (400 MHz, DMSO)  $\delta$  = 11.87 (s, 1H), 8.54 (dd, *J* = 8.3, 1.1, 1H), 8.48 (dd, *J* = 7.3, 1.1, 1H), 8.37 (d, *J* = 8.2, 1H), 7.84-7.70 (m, 1H), 7.17 (d, *J* = 8.2, 1H), 4.07 (t, *J* = 6.9, 2H), 2.29 (t, *J* = 7.4, 2H), 2.01-1.71 (m, 2H). <sup>13</sup>C-NMR (100 MHz, DMSO)  $\delta$  23.59, 31.82, 39.33, 110.32, 113.05, 122.22, 122.75, 125.91, 129.21, 129.61, 131.46, 133.89, 160.61, 162.52, 164.20, 174.42. HRMS calcd for C<sub>16</sub>H<sub>14</sub>NO<sub>5</sub><sup>+</sup> ([M + H]<sup>+</sup>) 300.0866, found 300.0864.

### Synthesis of compound 4

Compound 3 (0.1 g, 0.33 mmol) dissolved in methanol (15 mL), and then a few drops of concentrated sulfuric acid were added. The reaction mixture was stirred and refluxed for 8 h. After cooling to room temperature, removal of solvent under reduced pressure and purification by silica gel column chromatography with dichloromethane/methanol (10:1) as the eluent generated compound 4 as a yellow-color solid: yield 86 mg, 82.1%. <sup>1</sup>H-NMR (400 MHz, DMSO)  $\delta$  11.85 (s, 1H), 8.54 (dd, *J* = 8.3, 0.9 Hz, 1H), 8.51 - 8.45 (m, 1H), 8.36 (d, *J* = 8.2 Hz, 1H), 7.83 - 7.72 (m, 1H), 7.16 (d, *J* = 8.2 Hz, 1H), 4.07 (t, *J* = 6.9 Hz, 2H), 3.51 (s, 3H), 2.38 (t, *J* = 7.3 Hz, 2H), 1.91 (p, *J* = 7.1 Hz, 2H). <sup>13</sup>C-

NMR (100 MHz, DMSO) 173.32, 164.21, 163.53, 160.64, 133.88, 131.45, 129.61, 129.23, 125.90, 122.75, 122.20, 113.03, 110.32, 51.63, 39.12, 31.45, 23.48. HRMS calcd for  $C_{17}H_{16}NO_5^+$  ( $[M + H]^+$ ) 314.1023, found 314.1022.

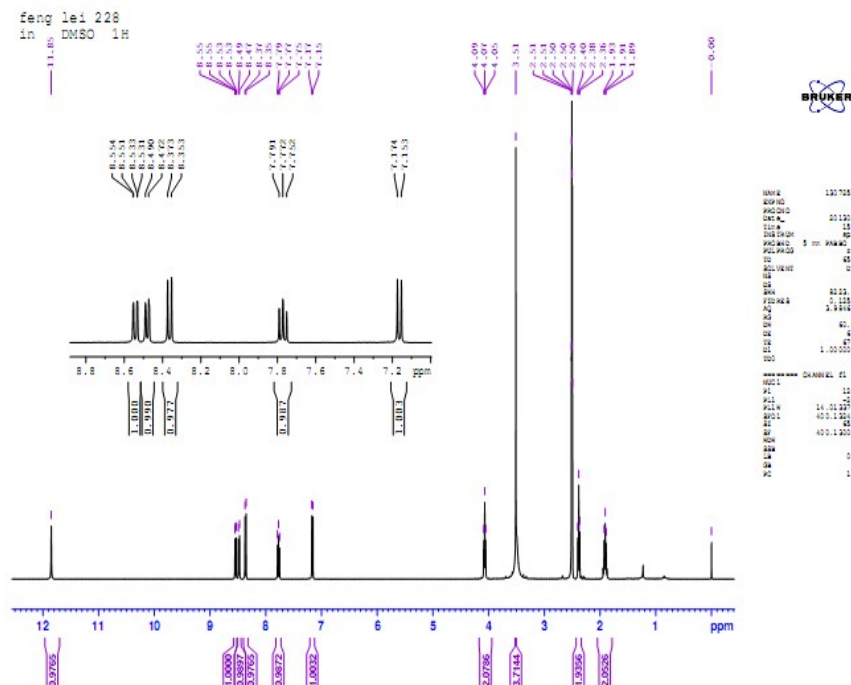

Fig. S1  $^1\text{H}$ -NMR spectrum of NMHN in scheme 1

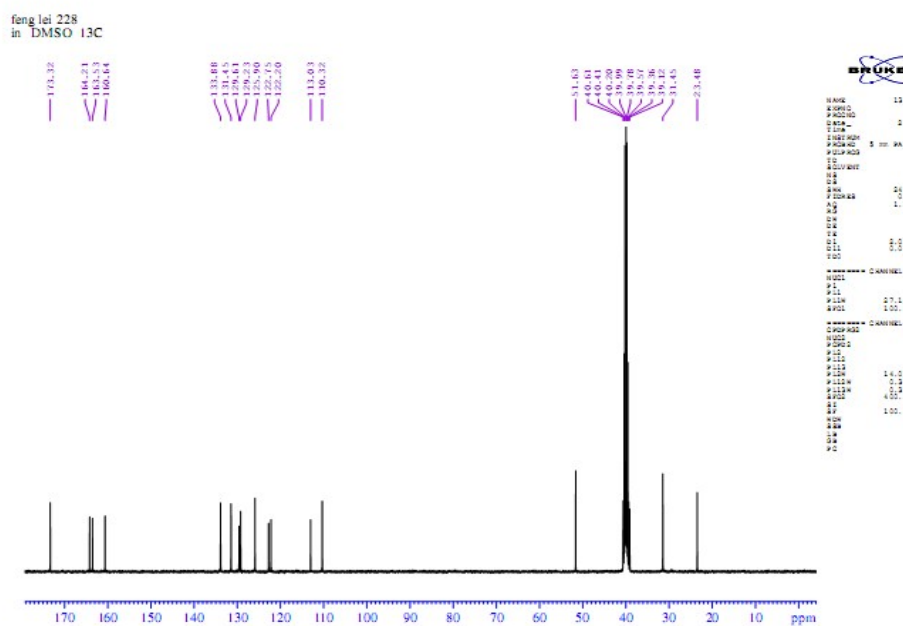

Fig. S2  $^{13}\text{C}$ -NMR spectrum of NMHN in scheme 1

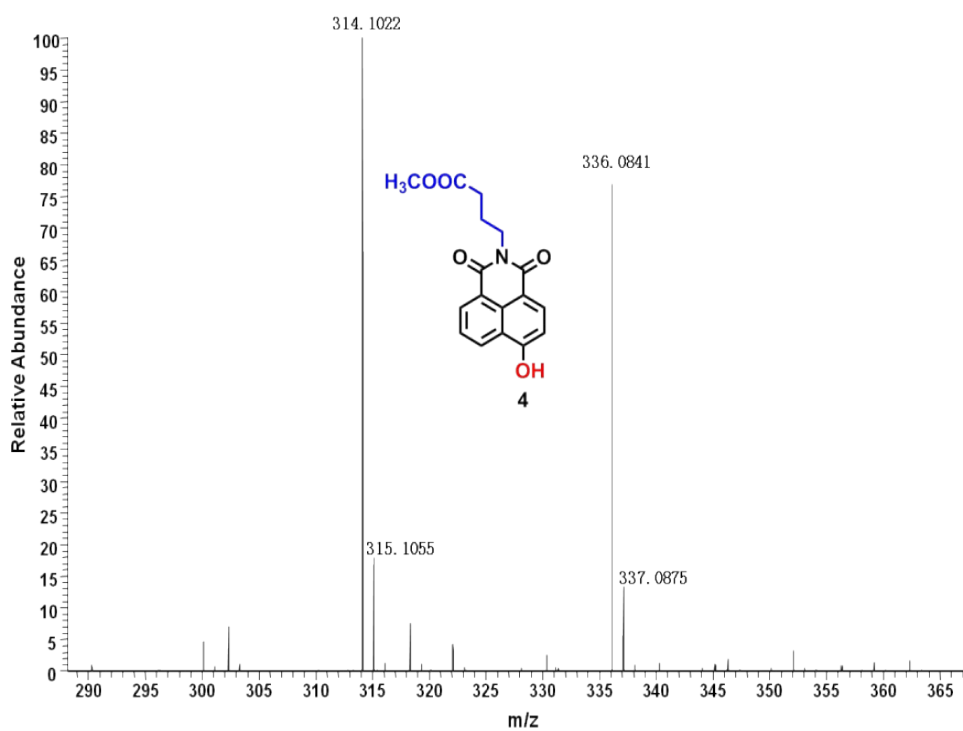

Fig. S3 HR-MS spectrum of NMHN in scheme 1

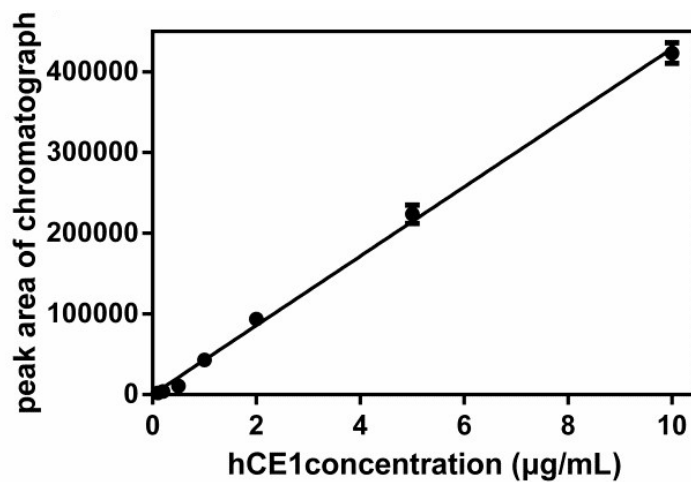

Fig. S4 NCHN formation rate in the presence of increasing concentration of hCE1. NMHN (50 µM) was incubated with increasing concentration of hCE1 (0.05-10 µg/mL).

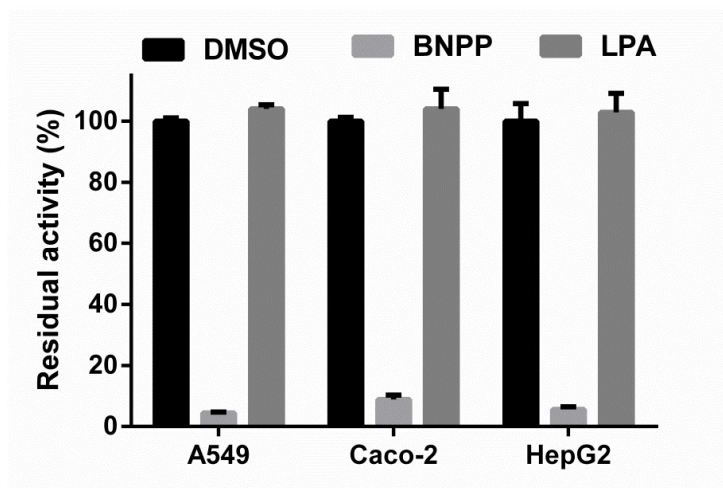

**Fig. S5** Inhibitory effects of two selective esterase inhibitors on NMHN hydrolysis in cell preparations.

**Table S1** The features of currently used probes for hCE1.

| Substrate                         | Structure | Kinetic behavior     | $K_m$ ( $\mu\text{M}$ )/ $V_{\text{max}}$ (nmol/min/mg) | $CL_{\text{int}}$ $\text{mL} \cdot \text{min}^{-1} \cdot \text{mg}^{-1}$ |
|-----------------------------------|-----------|----------------------|---------------------------------------------------------|--------------------------------------------------------------------------|
| Oseltamivir <sup>1</sup>          |           | Michaelis-Menten     | 177/102                                                 | 0.58                                                                     |
| Clopidogrel <sup>2</sup>          |           | Michaelis-Menten     | 62.7/3.6                                                | 0.06                                                                     |
| BMBT <sup>3</sup>                 |           | Substrate Inhibition | NA                                                      | NA                                                                       |
| Dabigatran <sup>4</sup> etexilate |           | Michaelis-Menten     | 24.9/0.7                                                | 0.03                                                                     |
| NMHN                              |           | Michaelis-Menten     | 53.1/684.3                                              | 12.9                                                                     |

NA, not available, the kinetic parameters for BMBT hydrolysis in hCE1 is unavailable because of the kinetic parameters can hardly be exactly calculated due to strong substrate

inhibition effect.

**Table S2** Regression coefficient, limit of detection (LOD) and limit of quantification (LOQ) for NCHN and NMHN by using two detectors.

| Detector | Analyte | Conc. Range<br>( $\mu\text{M}$ ) | $R^2$  | LOD<br>( $\mu\text{M}$ ) | LOQ<br>( $\mu\text{M}$ ) |
|----------|---------|----------------------------------|--------|--------------------------|--------------------------|
| LC-UV    | NCHN    | 0.5-50                           | 0.9997 | 0.2                      | 0.5                      |
|          | NMHN    | 0.5-50                           | 0.9994 | 0.2                      | 0.5                      |
| LC-FD    | NCHN    | 0.5-50                           | 0.9996 | 0.5                      | 1.0                      |
|          | NMHN    | 0.5-50                           | 0.9995 | 0.1                      | 0.2                      |

R=correlation coefficient; LOD=limit of detection; LOQ= limit of quantification

**Table S3** Intra- and inter-day precision and accuracy of the LC-FD method for quantitative determination of **NMHN** and **NCHN**.

| Analyte | Added | Intra-day  |         | Inter-day |         |
|---------|-------|------------|---------|-----------|---------|
|         |       | Found      | RSD (%) | (%)       | RSD (%) |
| NCHN    | 1.0   | 1.04±0.04  | 3.6     | 103.7     | 1.8     |
|         |       | 1.02±0.01  | 1.2     | 102.4     |         |
|         |       | 1.04±0.02  | 2.0     | 103.8     |         |
|         | 5.0   | 5.03±0.04  | 0.8     | 100.6     | 0.9     |
|         |       | 5.07±0.04  | 0.8     | 101.3     |         |
|         |       | 5.03±0.03  | 0.6     | 100.6     |         |
|         | 20.0  | 20.21±0.07 | 0.3     | 101.0     | 1.0     |
|         |       | 20.28±0.14 | 0.7     | 101.4     |         |
|         |       | 20.12±0.08 | 0.4     | 100.6     |         |
| NMHN    | 1.0   | 1.05±0.02  | 2.2     | 104.7     | 2.6     |
|         |       | 1.03±0.01  | 0.6     | 102.5     |         |
|         |       | 1.03±0.02  | 1.7     | 102.8     |         |
|         | 5.0   | 5.01±0.06  | 0.8     | 100.5     | 0.2     |
|         |       | 4.99±0.10  | 0.7     | 100.6     |         |
|         |       | 4.93±0.34  | 0.6     | 100.5     |         |
|         | 20.0  | 19.54±0.54 | 0.7     | 100.8     | 0.5     |
|         |       | 19.45±0.41 | 0.3     | 100.4     |         |
|         |       | 19.82±0.50 | 0.8     | 100.6     |         |

**Table S4** Recovery of the LC-UV method for quantitative determination of NMHN and NCHN in HLM.

| Analyte | Added concentration<br>( $\mu\text{M}$ ) | Recovery %<br>(Mean $\pm$ S.D.) | RSD<br>(%) |
|---------|------------------------------------------|---------------------------------|------------|
| NCHN    | 1                                        | 99.5 $\pm$ 6.8                  | 6.8        |
|         | 5                                        | 108.5 $\pm$ 5.8                 | 5.3        |
|         | 20                                       | 106.3 $\pm$ 3.6                 | 3.3        |
| NMHN    | 1                                        | 108.7 $\pm$ 8.1                 | 7.5        |
|         | 5                                        | 107.9 $\pm$ 2.3                 | 2.1        |
|         | 20                                       | 107.1 $\pm$ 1.7                 | 1.6        |

**Table S5** Recovery of the LC-FD method for quantitative determination of NMHN and NCHN in HLM.

| Analyte | Added concentration<br>( $\mu\text{M}$ ) | Recovery %<br>(Mean $\pm$ S.D.) | RSD<br>(%) |
|---------|------------------------------------------|---------------------------------|------------|
| NCHN    | 1                                        | 100.9 $\pm$ 3.2                 | 3.1        |
|         | 5                                        | 103.3 $\pm$ 2.4                 | 3.1        |
|         | 20                                       | 104.1 $\pm$ 4.9                 | 2.3        |
| NMHN    | 1                                        | 101.4 $\pm$ 3.1                 | 2.3        |
|         | 5                                        | 102.4 $\pm$ 2.3                 | 4.7        |
|         | 20                                       | 105.3 $\pm$ 1.5                 | 1.5        |

#### References

1. D. S. Shi, J. Yang, D. F. Yang, E. L. LeCluyse, C. Black, L. You, F. Akhlaghi and B. F. Yan, *J. Pharmacol. Exp. Ther.*, 2006, 319, 1477-1484.
2. H. J. Zhu, X. W. Wang, B. E. Gawronski, B. J. Brinda, D. J. Angiolillo and J. S. Markowitz, *J. Pharmacol. Exp. Ther.*, 2013, 344, 665-672.
3. Z. M. Liu, L. Feng, G. B. Ge, X. Lv, J. Hou, Y. F. Cao, J. N. Cui and L. Yang, *Biosens. Bioelectron.*, 2014, 57, 30-35.
4. S. C. Laizure, R. B. Parker, V. L. Herring and Z. Y. Hu, *Drug Metab. Dispos.*, 2014, 42, 201-206.
